# Supplementary material
Source: PubMed Central journal article supplement (PMC6609155)
Supplement: NIHMS1025982-supplement-Supplemental_Tables.pdf [file NIHMS1025982-supplement-Supplemental_Tables.pdf]

## Appendix A. Supplemental tables

**Table A1.** Values of coefficients in the multinomial logistics regression models in (4) to generate treatment assignment

| Value of Coefficients |                                                        |
|-----------------------|--------------------------------------------------------|
| $K = 1$               |                                                        |
| $\gamma_1$            | -0.20, 0.14, 0.14, 0.14, 0.14, -0.14, 0.14, 0.14, 0.14 |
| $K = 2$               |                                                        |
| $\gamma_1$            | -0.30, 0.10, 0.10, 0.10, 0.10, 0.10, 0.10, 0.10, 0.10  |
| $\gamma_2$            | -0.20, 0.14, 0.14, 0.14, 0.14, -0.14, 0.14, 0.14, 0.14 |
| $K = 3$               |                                                        |
| $\gamma_1$            | -0.30, 0.10, 0.10, 0.10, 0.10, 0.10, 0.10, 0.10, 0.10  |
| $\gamma_2$            | -0.20, 0.12, 0.12, -0.12, 0.12, 0.12, 0.12, 0.12, 0.12 |
| $\gamma_3$            | -0.20, 0.14, 0.14, 0.14, 0.14, -0.14, 0.14, 0.14, 0.14 |
| $K = 4$               |                                                        |
| $\gamma_1$            | -0.30, 0.10, 0.10, 0.10, 0.10, 0.10, 0.10, 0.10, 0.10  |
| $\gamma_2$            | -0.20, 0.11, -0.11, 0.11, 0.11, 0.11, 0.11, 0.11, 0.11 |
| $\gamma_3$            | -0.20, 0.13, 0.13, 0.13, 0.13, 0.13, 0.13, 0.13, -0.13 |
| $\gamma_4$            | -0.20, 0.14, 0.14, 0.14, 0.14, -0.14, 0.14, 0.14, 0.14 |
| $K = 5$               |                                                        |
| $\gamma_1$            | -0.30, 0.10, 0.10, 0.10, 0.10, 0.10, 0.10, 0.10, 0.10  |
| $\gamma_2$            | -0.30, 0.11, -0.11, 0.11, 0.11, 0.11, 0.11, 0.11, 0.11 |
| $\gamma_3$            | -0.20, 0.12, 0.12, -0.12, 0.12, 0.12, 0.12, 0.12, 0.12 |
| $\gamma_4$            | -0.20, 0.13, 0.13, 0.13, 0.13, 0.13, 0.13, 0.13, -0.13 |
| $\gamma_5$            | -0.20, 0.14, 0.14, 0.14, 0.14, -0.14, 0.14, 0.14, 0.14 |

**Table A2.** Values of coefficients used in generalized linear models in (5) to generate outcomes

|           | Continuous Outcome               | Binary Outcome                     |
|-----------|----------------------------------|------------------------------------|
| $K = 1$   |                                  |                                    |
| $\beta_0$ | -1, -1, 2, -1, -1, 1, 2, -2, 1   | 1.3248, 2, 1, -1, 1, -1, -1, 1, -2 |
| $\beta_1$ | 0.5, 1, 1, 1, 1, 1, 1, 1, -1     | 0.012, -1, -2, 1, -1, 1, 2, -2, 1  |
| $K = 2$   |                                  |                                    |
| $\beta_0$ | -1, -1, 2, -1, -1, 1, 2, -2, 1   | 1.3248, 2, 1, -1, 1, -1, -1, 1, -2 |
| $\beta_1$ | 0.4, -1, -1, 2, -1, 1, 1, -1, -1 | 1.3248, 2, 1, -1, 1, -1, -1, 1, -2 |
| $\beta_2$ | 0.5, 1, 1, 1, 1, 1, 1, 1, -1     | 0.012, -1, -2, 1, -1, 1, 2, -2, 1  |
| $K = 3$   |                                  |                                    |
| $\beta_0$ | -1, -1, 2, -1, -1, 1, 2, -2, 1   | 1.3248, 2, 1, -1, 1, -1, -1, 1, -2 |
| $\beta_1$ | 0.4, -1, -1, 2, -1, 1, 1, -1, -1 | 1.3248, 2, 1, -1, 1, -1, -1, 1, -2 |
| $\beta_2$ | 0.5, 1, 1, 1, 1, 1, 1, 1, -1     | 0.012, -1, -2, 1, -1, 1, 2, -2, 1  |
| $\beta_3$ | 0.6, 2, 1, -1, 1, -1, -1, 1, 2   | 0.012, -1, -2, 1, -1, 1, 2, -2, 1  |
| $K = 4$   |                                  |                                    |
| $\beta_0$ | -1, -1, 2, -1, -1, 1, 2, -2, 1   | 1.3248, 2, 1, -1, 1, -1, -1, 1, -2 |
| $\beta_1$ | 0.4, -1, -1, 2, -1, 1, 1, -1, -1 | 1.3248, 2, 1, -1, 1, -1, -1, 1, -2 |
| $\beta_2$ | 0.5, 1, 1, 1, 1, -2, -1, 1, 1    | 1.3248, 2, 1, -1, 1, -1, -1, 1, -2 |
| $\beta_3$ | 0.5, 1, 1, 1, 1, 1, 1, 1, -1     | 0.012, -1, -2, 1, -1, 1, 2, -2, 1  |
| $\beta_4$ | 0.6, 2, 1, -1, 1, -1, -1, 1, 2   | 0.012, -1, -2, 1, -1, 1, 2, -2, 1  |
| $K = 5$   |                                  |                                    |
| $\beta_0$ | -1, -1, 2, -1, -1, 1, 2, -2, 1   | 1.3248, 2, 1, -1, 1, -1, -1, 1, -2 |
| $\beta_1$ | 0.4, -1, -1, 2, -1, 1, 1, -1, -1 | 1.3248, 2, 1, -1, 1, -1, -1, 1, -2 |
| $\beta_2$ | 0.5, 1, 1, 1, 1, -2, -1, 1, 1    | 1.3248, 2, 1, -1, 1, -1, -1, 1, -2 |
| $\beta_3$ | 0.5, 1, 1, 1, 1, 1, 1, 1, -1     | 0.012, -1, -2, 1, -1, 1, 2, -2, 1  |
| $\beta_4$ | 0.6, 2, 1, -1, 1, -1, -1, 1, 2   | 0.012, -1, -2, 1, -1, 1, 2, -2, 1  |
| $\beta_5$ | 0.5, 1, 1, 1, 2, -1, 1, -1, 1    | 0.012, -1, -2, 1, -1, 1, 2, -2, 1  |

**Table A3.** True values of  $E\{Y(t)\}$  in simulation studies

|                           | $E\{Y(0)\}$ | $E\{Y(1)\}$ | $E\{Y(2)\}$ | $E\{Y(3)\}$ | $E\{Y(4)\}$ | $E\{Y(5)\}$ |
|---------------------------|-------------|-------------|-------------|-------------|-------------|-------------|
| <b>Continuous Outcome</b> |             |             |             |             |             |             |
| $K = 1$                   | 1.0         | 2.0         |             |             |             |             |
| $K = 2$                   | 1.0         | 1.0         | 2.0         |             |             |             |
| $K = 3$                   | 1.0         | 1.0         | 2.0         | 2.0         |             |             |
| $K = 4$                   | 1.0         | 1.0         | 1.0         | 2.0         | 2.0         |             |
| $K = 5$                   | 1.0         | 1.0         | 1.0         | 2.0         | 2.0         | 2.0         |
| <b>Binary Outcome</b>     |             |             |             |             |             |             |
| $K = 1$                   | 0.4         | 0.6         |             |             |             |             |
| $K = 2$                   | 0.4         | 0.4         | 0.6         |             |             |             |
| $K = 3$                   | 0.4         | 0.4         | 0.6         | 0.6         |             |             |
| $K = 4$                   | 0.4         | 0.4         | 0.4         | 0.6         | 0.6         |             |
| $K = 5$                   | 0.4         | 0.4         | 0.4         | 0.6         | 0.6         | 0.6         |
